# Supplementary material for: The truly symmetrical doubly-bridging mode of trimethylphosphine in a dinuclear rhodium complexElectronic supplementary information (ESI) available: experimental details. See http://www.rsc.org/suppdata/cc/b3/b301251d/
Source: Royal Society of Chemistry journal article supplement (doi:10.1039/b301251d), 2003-04-16
Supplement: b301251d.doc [file b301251d.doc]

**Supplementary material** (Thomas Pechmann, Carsten D. Brandt, Helmut Werner)

## Preparations

**[Rh2Br(2-acac)(-CPh2)2(-PMe3)] 3**. A solution of [Rh2(2-acac)2(-CPh2)2(-PMe3)] **2** (132 mg, 0.16 mmol) in toluene (20 cm3) was cooled at 50 °C and treated dropwise with Me3SiBr (0.21 cm3, 0.16 mmol). After the solution was warmed to room temperature and stirred for 30 min, the solvent was evaporated in vacuo. The residue was washed twice with diethyl ether (2 cm3 each) and recrystallized from acetone (5 cm3) at 60 °C. Dark red crystals precipitated which were washed with small amounts of diethyl ether and dried. Yield 118 mg (92%); mp 144 °C (decomp.) (Found: C, 51.07; H, 4.57. C34H36BrO2PRh2 requires: C, 51.47; H, 4.57%).

**[Rh2I(2-acac)(-CPh2)2(-PMe3)] 4**. This compound was prepared as described for **3** from **2** (99 mg, 0.12 mmol) and Me3SiI (0.17 cm3, 0.12 mmol) in toluene (20 cm3). After recrystallization from acetone, dark brown crystals were obtained. Yield 96 mg (94%); mp 116 °C (decomp.) (Found: C, 49.01; H, 4.54. C34H36IO2PRh2 requires: C, 48.60; H, 4.32%).

**[Rh2Br2(-CPh2)2(-PMe3)] 5**. A solution of [Rh2(2-acac)2(-CPh2)2(-PMe3)] **2** (100 mg, 0.12 mmol) in benzene (25 cm3) was treated dropwise with Me3SiBr (0.31 cm3, 0.25 mmol) and stirred for 24 h at room temperature. The solvent was evaporated in vacuo, the residue was washed twice with diethyl ether (2 cm3 each) and recrystallized from acetone (4 cm3) at 25 °C. Red crystals precipitated which were washed with small amounts of diethyl ether and dried. Yield 88 mg (92%); mp 63 °C (decomp.) (Found: C, 44.14; H, 4.23. C29H29Br2PRh2 requires: C, 44.99; H, 3.78%).

**[Rh2I2(-CPh2)2(-PMe3)] 6**. This compound was prepared as described for **5** from **2** (214 mg, 0.26 mmol) and Me3SiI (0.67 cm3, 0.53 mmol) in benzene (20 cm3). After recrystallization from acetone, red crystals were obtained. Yield 205 mg (90%); mp 80 °C (decomp.) (Found: C, 39.72; H, 3.52. C29H29I2PRh2 requires: C, 40.12; H, 3.37%).

**[Rh2Cl2(-CPh2)2(-PiPr3)] 10**. A solution of [(PiPr3)Rh(-CPh2)2Rh(2-acac)2] **7** (105 mg, 0.12 mmol) in benzene (100 cm3) was treated under vigorous stirring with a solution of HCl (c = 0.16 mol/l) in benzene (7.32 cm3, 1.17 mmol) at room temperature. After ca. 30 s, a change of colour from brownish-green to red occurred. The solvent was evaporated in vacuo and the residue was washed three times with diethyl ether (3 cm3 each) at 0 °C. The remaining red-brown solid was dried in vacuo. Yield 82 mg (91%); mp 119 °C (decomp.) (Found: C, 54.85; H, 5.40. C35H41Cl2PRh2 requires: C, 54.64; H, 5.37%).

**[Rh2Cl2(-CPh2)2(-PPh3)] 11**. This compound was prepared as described for **9** from [(PPh3)Rh(-CPh2)2Rh(2-acac)2] **8** (139 mg, 0.14 mmol) and a solution of HCl (c = 0.16 mol/l) in benzene (8.70 cm3, 1.39 mmol) at room temperature. After ca. 2 min, the solvent was evaporated in vacuo and the residue was washed three times with diethyl ether (3 cm3 each) at 0 °C. The 13C and 31P NMR spectra of the brown solid indicated that besides **10** some impurities (ca. 10%) were present which could not be separated either by recrystallization or column chromatography.
